# Supplementary material for: Brief Research Report: Case Study on the Early Impacts of COVID-19 on Urban Natural Areas Across 12 American Cities
Source: Frontiers journal article supplement (doi:10.3389/frsc.2021.725904), 2021-12-17
Supplement: Data_Sheet_1.PDF [file Data_Sheet_1.PDF]

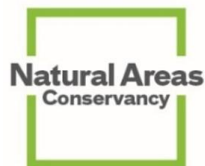

## Questions

**The impact of COVID-19 crisis on city life is significant. In this survey, we are seeking to understand how this crisis has impacted natural area parkland and the organizations that manage them in cities across America. This survey asks questions about public use, new restrictions, and funding and management changes of natural areas during this crisis, Please complete this survey on behalf of the organization you work for.**

**Select your city or region**

If you selected "other" please write in the city or region here:

**Please fill out your identifying information below:**

Name

Title

Organization

Organization type (e.g. city government, non-profit, consultant, academic, other)

**Provide an estimate of the acres of parks and natural areas in your city/region:**

Acres of total parkland (not just natural areas)

Acres of natural area parkland

**Between March 1 and today, did any of the following apply to parks (not just natural areas) in your city:**

- ☐ Restricted due to COVID-19 (e.g. hours, number of people)
- ☐ Closed due to COVID-19
- ☐ Remained open with no new restrictions
- ☐  Other (describe)
- ☐ I don't know

**Between March 1 and today, did any of the following apply to NATURAL AREAS in your city:**

- ☐ Restricted due to COVID-19 (e.g. hours, number of people)
- ☐ Closed due to COVID-19
- ☐ Remained open with no new restrictions
- ☐  Other (describe):
- ☐ I don't know

**Please describe park and natural area restrictions or closures in your city or region due to COVID-19 here:**

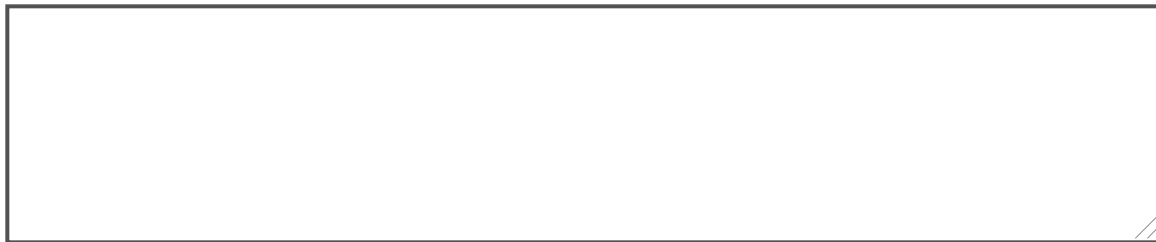

**Has your organization engaged in advocacy with regards to budgets, staffing, or regulations for natural areas or parkland during this period?**

- ☐ Yes
- ☐ No
- ☐ I don't know

**If so, please briefly describe these advocacy efforts:**



**Has your organization engaged in targeted communications (press, social media, or email marketing) about the value of natural areas, or promoted visitation of natural areas during this period?**

- ☐ Yes
- ☐ No
- ☐ I don't know

**If so, please briefly describe these communication efforts here:**



**Have you collaborated with local, regional, state or federal partners in response to the COVID-19 crisis (e.g. sharing guidance on safety precautions for staff and volunteers, collaborative fundraising, discussions about organizational mergers)?**

- ☐ Yes
- ☐ No
- ☐ I don't know

**If so, please share names of partners and/or types of partnerships here:**

**Has the current crisis resulted in any of the following changes to your organization's programmatic work?**

|                                                         | Yes                   | No                    | Does not apply        | I don't know          |
|---------------------------------------------------------|-----------------------|-----------------------|-----------------------|-----------------------|
| Decrease in the ability to manage/restore natural areas | <input type="radio"/> | <input type="radio"/> | <input type="radio"/> | <input type="radio"/> |
| Decrease in volunteer hours                             | <input type="radio"/> | <input type="radio"/> | <input type="radio"/> | <input type="radio"/> |
| Cancelled public programs                               | <input type="radio"/> | <input type="radio"/> | <input type="radio"/> | <input type="radio"/> |
| Impacted ability to plant trees or shrubs               | <input type="radio"/> | <input type="radio"/> | <input type="radio"/> | <input type="radio"/> |
| Impacted research efforts                               | <input type="radio"/> | <input type="radio"/> | <input type="radio"/> | <input type="radio"/> |

**The following questions relate to the impact of the current COVID-19 crisis on your organization's finances and staffing. Please answer ONLY for natural areas staff. *If you do not wish to share this information please select "I don't know".***

|                                            | Yes                   | No                    | Does not apply        | I don't know          |
|--------------------------------------------|-----------------------|-----------------------|-----------------------|-----------------------|
| My organizations budget has been impacted. | <input type="radio"/> | <input type="radio"/> | <input type="radio"/> | <input type="radio"/> |

|                                                                             | Yes                   | No                    | Does not<br>apply     | I don't know          |
|-----------------------------------------------------------------------------|-----------------------|-----------------------|-----------------------|-----------------------|
| My organization has cut full time<br>natural resource staff                 | <input type="radio"/> | <input type="radio"/> | <input type="radio"/> | <input type="radio"/> |
| My organization has cut part time<br>staff                                  | <input type="radio"/> | <input type="radio"/> | <input type="radio"/> | <input type="radio"/> |
| My organization has furloughed staff                                        | <input type="radio"/> | <input type="radio"/> | <input type="radio"/> | <input type="radio"/> |
| Summer seasonal hiring (including<br>paid internships) has been<br>impacted | <input type="radio"/> | <input type="radio"/> | <input type="radio"/> | <input type="radio"/> |

**If you would like to add any information or context about your answers to the staffing questions above please do so here.**

**If your organization has adopted protocols to keep staff safe during this period? Please describe.**

**How confident are you that your organization will have adequate funding to continue your work in natural areas in 2021?**

- ☐ Definitely will
- ☐ Probably will
- ☐ Might or might not
- ☐ Probably will not
- ☐ Definitely will not

**If budget cuts are expected (2020-2021) do you expect natural areas will receive relatively more, less, or the same budget cuts compared to other park or green-space types (e.g. pools, playgrounds)?**

- ☐ We expect natural areas funding will have greater relative budget cuts
- ☐ We expect natural area funding will have proportional budget cuts
- ☐ We expect natural area funding to have lower relative budget cuts
- ☐ We don't anticipate budget cuts
- ☐ I don't know

**Please provide any examples of the impact to your work as a result of decreased capacity due to the COVID crisis (1-2 sentences each):**



Example 1



Example 2



Example 3



**Has COVID-19 resulted in any observed changes in the public's use of natural areas in your city/region?**

- ☐ We have observed an increase in public use of natural areas
- ☐ We have observed a decrease in public use of natural areas
- ☐ No observed change in public use of natural areas
- ☐ I don't know

**Please provide any examples of how public use of natural areas has changed (1-2 sentences).**

Example 1



Example 2



Example 3

A small, empty rectangular box with a thin black border, likely a placeholder for a logo or image.

**Have you observed any changes in wildlife or environmental quality during this period that may be linked to altered public behaviors or management practices resulting from COVID-19? If so please describe.**

A large, empty rectangular box with a thin black border, intended for a detailed text response.

**Please share a hopeful observation, story, and/or feedback from your constituents about the role of natural areas in your city during COVID.**

A large, empty rectangular box with a thin black border, intended for a detailed text response.

**Please upload a high resolution picture(s) of natural areas in your city that we could use in a report or media. Pictures could highlight the beauty of natural areas, hiking trails, people using safe social distancing, the impacts of COVID -19 on natural areas, springtime in your city.**

Upload Picture 1

Picture 1 location, credit & caption

Upload Picture 2

Picture 2 location, credit and caption

## Upload Picture 3

Picture 3 location, credit and caption



**OPTIONAL: Please provide a quote from an authorized spokesperson of your organization expressing concerns about the impact of the COVID-19 crisis on your organization and the subsequent impact on natural areas. Please also provide their name as they would like it published, as we may include this quote in our press release.**



**End of Survey. Thank you.**

Powered by Qualtrics
